# Supplementary material for: Hip muscular strength balance is associated with running economy in recreationally-trained endurance runners
Source: PeerJ. 2018 Jul 24;6:e5219. doi: 10.7717/peerj.5219 (PMC6063213; doi:10.7717/peerj.5219)
Supplement: Data S1 [file peerj-06-5219-s001.xlsx]

## Sheet: Plan1
volunteer	sex	age (years)	weight (kg)	height (cm)	VO2max (mL/kg/min)	PT Ext D 60°/s (N-M) hip	PT Ext E 60°/s (N-M) hip	PT Ext D 180°/s (N-M) hip	PT Ext E 180°/s (N-M) hip	PT FL Exc D 180°/s hip	PT FL Exc E 180°/s hip	PT Flex D 60°/s (N-M) hip	PT Flex E 60°/s (N-M) hip	PT Flex D 180°/s (N-M) hip	PT Flex E 180°/s (N-M) hip	PT EX Exc D 180°/s hip	PT EX Exc E 180°/s hip	conv ratio(FL/EX) 60°/s D (%) hip	conv ratio(FL/EX) 60°/s E(%) hip	Funcional ratio (FL exc/EX con) D hip	Funcional ratio (FL exc/EX con) E hip	PT Ext D 60°/s (N-M) knee	PT Ext E 60°/s (N-M) knee	PT Ext D 240°/s (N-M) knee	PT Ext E 240°/s (N-M) knee	PT FL Exc D 240°/s knee	PT FL Exc E 240°/s knee	PT Flex D 60°/s (N-M) knee	PT Flex E 60°/s (N-M) knee	PT Flex D 240°/s (N-M) knee	PT Flex E 240°/s (N-M) knee	PT EX Exc D 240°/s knee	PT EX Exc E 240°/s knee	conv ratio(FL/EX) 60°/s D (%) knee	conv ratio(FL/EX) 60°/s E(%) knee	Funcional ratio (FL exc/EX con) D knee	Funcional ratio(FL exc/EX con) E knee
1	1	35	64	165	67.85	100.9	153.2	98.4	124.4	240.8	211.6	101	103.6	91.6	93.8	226.3	168.9	51.2	67.624	2.44715	1.70096	160.7	180.2	105.4	105.5	151.8	104.1	98	83.7	69.5	72.5	150.2	117.5	60.9832	46.4484	1.44023	0.98673
2	1	27	85	181	54.26	217.9	208.7	185.3	175	142.6	156.8	103.6	137.8	109	100	287	278.5	47.5447	66.0278	0.769563	0.896	176.5	153.4	112.6	110.7	185.7	166.4	115.7	97.8	87.8	80.2	308.5	306.4	65.5524	63.7549	1.6492	1.50316
3	1	30	73.6	178	59.58	166.4	153.6	121.9	116	122.7	127.6	84.8	78.3	80.1	82.3	238.7	280.7	50.9615	50.9766	1.00656	1.1	164.2	126.6	94.4	89	151.3	140.9	97.7	77.3	59.1	48.7	200.1	226.7	59.5006	61.0585	1.60275	1.58315
4	1	29	76.1	185	53.72	265.4	210.4	244.3	186.3	159.8	134.7	113.4	107.3	90.3	107.7	317.1	251.1	42.728	50.9981	0.654114	0.723027	186.6	192.2	130.6	139.1	143.1	135.7	125.7	123	90.6	88.5	279.9	284.5	67.3633	63.9958	1.09571	0.975557
5	2	41	61	165	53.62	145.1	113.9	127.9	111.3	210.5	128.5	72.9	61.7	76.6	62.4	103.6	90.3	50.2412	54.1703	1.64582	1.15454	109.1	127.4	63.5	68.8	89.5	89	55.7	60.4	38.1	41.1	87.2	91.5	51.0541	47.4097	1.40945	1.2936
6	1	20	52.7	162	72.43	144.3	118.5	114.1	99.9	246.4	217.4	85	84.6	82.7	71.1	312.3	289.5	58.9051	71.3924	2.15951	2.17618	142.4	141.8	89.8	86.5	171	138.6	86.3	85.1	52.9	53.5	150.9	128.7	60.6039	60.0141	1.90423	1.60231
7	1	26	76	185	66.66	182.4	180.2	171.8	219.9	199	156	99.7	107.9	94.9	95.8	335.3	324.7	54.6601	59.8779	1.15832	0.709413	183.4	211.4	132	131.6	174.1	167.1	106.9	109.8	94.3	89.9	277.9	288.9	58.2879	51.9395	1.31894	1.26976
8	1	20	68.7	182	53.9	233.9	224	201.9	161.9	161.6	175.6	112.2	104.2	107.9	102.8	302.8	356.6	47.9692	46.5179	0.800396	1.08462	212.6	207.1	143.4	123.6	136.7	147.8	121.7	110.8	97.8	89.2	223.9	247.9	57.2437	53.5007	0.953278	1.19579
9	1	40	62.6	168	62.54	185.4	180.6	157.8	157	119.8	133.5	84.6	83.6	89.4	77.6	341.5	359.2	45.6311	46.2901	0.759189	0.850318	151.6	147	96.7	92.6	127.6	135.9	90	105	70.2	77.5	219.4	232.6	59.3668	71.4286	1.31954	1.4676
10	1	35	74.9	177	60.79	174.1	187.7	187.2	180.3	130.4	135.1	91.7	102.1	114.7	89.3	273.6	262	52.6709	54.3953	0.696581	0.749307	150.1	189.1	118.3	127.3	127.1	108	101	108.1	62	70.4	262.3	191.4	67.2885	57.1655	1.07439	0.84839
11	2	31	50.7	162	58.2	101.9	106.4	100.6	82.2	86.9	76.7	47.2	51.6	45.6	61.1	178.3	197.6	46.3199	48.4962	0.863817	0.93309	111	117	73.8	83.8	98.7	86.2	66.2	61.1	52.1	63.3	139.2	111.3	59.6396	52.2222	1.3374	1.02864
12	1	25	78	178	51.15	248.9	241.5	166.2	151.3	172.8	151.4	129.8	121.1	93.1	95	410.4	340.3	52.1495	50.1449	1.03971	1.00066	237	230.1	121.2	125.5	219.1	209.1	109.9	105	73.3	72.1	379.1	384.5	46.3713	45.6323	1.80776	1.66614
13	1	39	60	176	59.27	191.1	178.4	158.4	156.8	127.1	130.6	89.3	74.8	81.9	72.1	297	316	46.7295	41.9283	0.802399	0.832908	157.1	145.5	88.8	84.4	99.4	119.8	89.7	80.5	56	53.1	264.5	250.8	57.0974	55.3265	1.11937	1.41943
14	1	31	75	178	58.39	264.1	258.1	238.8	236.7	425.6	286.2	145.7	135.8	123.4	126.2	501.3	419.9	55.1685	52.6153	1.78224	1.55851	211.3	204.8	113	121.2	172.5	198.3	136.4	118.6	93.2	80.9	278.9	312.9	64.5528	57.9102	1.52655	1.63614
15	1	33	79	183	59.42	197.5	177.9	175.4	180.4	185.4	159.7	101.6	109.5	86.1	90.6	321.4	287.5	51.443	61.5514	1.05701	0.885255	195.1	201.3	123.4	123.1	161.4	129.6	92.5	84.5	72.8	68.4	227.3	209.4	47.4116	41.9771	1.30794	1.0528
16	1	46	69	170	56.26	182	150.5	151.6	153.1	136.2	149.3	81	95.5	93.8	87.3	294	333.6	44.5055	63.4551	0.898417	0.97518	155.5	201.5	111.8	116.3	138.8	131.3	91.6	111.2	70.7	75.9	188.1	282.3	58.9068	55.1861	1.2415	1.12898
17	1	32	67	172	64.48	192.9	192.6	164.3	145.9	188.9	152.2	109.5	98.1	96.7	85.4	336.8	303.9	56.7652	50.9346	1.14973	1.04318	188.7	185.4	112.3	107.6	178.2	166	103.3	97.6	80.5	75.8	283.6	283.8	54.743	52.6429	1.58682	1.54275
18	2	24	58	167	54.13	154.2	133	134	107.7	92.2	117.8	68	71.2	62.4	62.5	239.9	192.5	44.0986	53.5338	0.68806	1.09378	144.7	148.7	87	86.7	100	102.8	80.3	70	60.4	61.8	161.9	172.7	55.4941	47.0746	1.14943	1.1857
19	1	23	62	178	66.15	165.7	170.3	121.1	106.8	209.3	199.2	96.4	93.1	85.5	91	142.9	142.8	58.1774	54.6682	1.72832	1.86517	201.9	194.2	111.9	106.8	135.9	135	99.3	101.6	56.7	57.7	131.5	138.5	49.1828	52.3172	1.21448	1.26404
20	2	32	60	163	57.72	134.8	98.5	112.3	92.6	197.8	254.7	58.3	55.3	64.8	52	291.4	304.5	43.2493	56.1421	1.76135	2.75054	124.1	136.3	83.3	86.6	117.2	110.3	43.2	65.6	41.2	50.5	93.7	93.4	34.8106	48.1291	1.40696	1.27367
21	2	22	46	158	64.05	117.5	112.2	103.9	99.7	81.7	86.7	54.2	50.6	48.9	57.8	176.2	227.1	46.1277	45.098	0.786333	0.869609	111.5	91.7	67.8	56.3	99	93.7	65.1	51.4	49.4	41.9	148.7	161.9	58.3857	56.0523	1.46018	1.6643
22	1	49	63	163	52.53	172.7	147.2	139.8	117	277.4	226.9	96.2	82.5	78.5	81.3	328.7	287	55.7035	56.0462	1.98426	1.93932	158	175.1	99.8	105.4	136.3	137.4	77.6	83.3	47	45	104.6	112.2	49.1139	47.5728	1.36573	1.30361
23	1	33	82	184	60.95	215.4	197.1	144.8	213.3	334.4	151.7	121.5	120.3	104.8	108.4	465.7	300	56.4067	61.035	2.30939	0.711205	283	285.8	158.9	150.8	208.9	175.9	162.5	135.4	99.9	101.6	276.2	297.9	57.4205	47.3758	1.31466	1.16645
24	1	27	69	171	68.38	258.3	209.8	210.6	184.9	148.6	152	138.6	122.7	124.6	115.3	334.1	359.3	53.6585	58.4843	0.705603	0.822066	218.8	208.6	116.1	119.9	168.3	107.6	106	123.5	69.8	75.8	275.8	270.6	48.4461	59.2042	1.44961	0.897415
25	1	22	76	182	59.32	245.5	192.2	207.9	191.7	317	292.3	120.4	118.3	94.7	101.5	335.2	323	49.0428	61.5505	1.52477	1.52478	188.8	178.5	115.2	103.2	133.9	158.8	111	99.6	84.4	66.7	139.5	156.9	58.7924	55.7983	1.16233	1.53876
26	1	36	67	181	58.61	249.8	223.7	213.8	202.3	166.2	156	122.1	134.9	103.2	104.2	408.9	440.4	48.8791	60.304	0.777362	0.771132	161.7	204.6	105.7	110.6	178.2	193	115.3	100.6	86.5	75.5	310.6	289.1	71.3049	49.1691	1.6859	1.74503
27	1	25	68	179	70	241.5	231	202.7	211.5	136.9	202.1	125.3	116	113.4	100.7	334.8	322.4	51.8841	50.2165	0.675382	0.955556	211.4	200.9	115.3	115.8	186.3	202.3	123.6	122.9	86.8	87.8	288.3	304.5	58.4674	61.1747	1.61578	1.74698
28	1	21	59	164	64.01	196.7	186.9	143.6	131.8	394.9	440.4	79.5	82.2	69.1	74.3	442	480.9	40.4169	43.9807	2.75	3.34143	136.6	144.1	76.5	76.9	166.8	156.7	90	98.5	62.5	61	246.7	242	65.8858	68.3553	2.18039	2.03771
29	2	37	55	166	51.37	138.4	140	116.9	116.7	156	104.7	65.4	60	66.3	74.2	260.4	224.2	47.2543	42.8571	1.33447	0.897172	88	102.5	55.2	64.2	93.1	95.9	55	56.4	38.5	41	44.3	125.1	62.5	55.0244	1.68659	1.49377
30	2	30	58	164	50.05	137	133.1	117.1	102.8	133.7	126.3	90.5	64.5	66.8	68.1	239	224.6	66	48.4598	1.14176	1.2286	185.1	175.3	108.2	102.4	119	126.4	82	73.3	63.2	59.1	242.3	192.2	44.3004	41.814	1.09982	1.23438
31	2	29	56	160	54.96	152.3	127.8	123.4	96.8	84.8	88.3	56.4	54.5	57.8	62.7	214.1	209	37.0322	42.6448	0.687196	0.91219	142.8	126.4	79.2	81.9	102.1	82.2	63.7	58.5	45.2	51.7	178.8	157.1	44.6078	46.2816	1.28914	1.00366
32	2	31	61	164	57	156.8	147.2	130.1	125.9	102	169.9	71.8	89.6	66.9	74.8	262.6	270.8	45.7908	60.8696	0.784012	1.34948	129.5	100.8	85.6	79.3	99.4	93.4	63.9	67.6	55.5	54.3	202.6	84.4	49.3436	67.0635	1.16121	1.17781
33	2	18	46	157	53.49	119.6	91.6	108.1	90.1	108.5	223	59	49.7	54	54.6	212.2	294.7	49.3311	54.2576	1.0037	2.47503	85.7	90.2	67.6	65.4	103.6	99.1	48.5	31.6	39.3	31.7	153.4	144.4	56.5928	35.0333	1.35	1.29
34	2	39	60	172	51.67	172.1	185.8	123.9	167.2	130.3	126.5	72.3	78.5	79.3	81.3	275.8	240.6	42.0105	42.2497	1.05165	0.754773	140.8	124.4	77.9	82.9	116.7	130.7	81.4	78.2	52.9	56.4	115.4	129.7	57.8125	62.8617	1.49807	1.5766
35	2	36	56	160	54.68	140.6	158.9	128	116.1	116.1	111.4	72.9	64.9	64.1	68.3	285.8	271.2	51.8492	40.8433	0.907031	0.959518	132.6	124.2	76.8	74.9	110.6	94.7	65.7	57.5	44.3	45.6	214.1	195.1	49.5475	46.3	1.4401	1.26435
36	2	32	56	158	53.12	130.7	142.8	83.3	103.8	92	91.1	61.8	60.8	56.6	36.7	213	208.7	47.2839	42.577	1.10444	0.877649	131.7	132	73.2	67.8	110.9	94.6	70.8	71.2	47.9	44.1	189.7	171.1	53.7585	53.9394	1.51503	1.39528
37	2	27	58	163	52.65	140.8	135.2	104.4	127.8	118.5	105.5	73.3	72.8	63.1	72.4	200.1	179.9	52.0597	53.8462	1.13506	0.825509	140.3	130.9	84.4	78.5	107.9	104.3	75.5	72.7	62	57.9	158.2	170.3	53.8133	55.5386	1.27844	1.32866
38	2	40	53.9	164	51.86	134.4	144.4	112.5	112.5	90.5	94.3	70.8	67.2	56.4	56.9	175	187.2	52.6786	46.5374	0.804444	0.838222	125.4	124.5	67.2	71.6	85.7	83.2	64.3	57.2	45.6	42.2	172	166.6	51.2759	45.9438	1.2753	1.16201
39	1	30	79	182	63.96	235.8	197.9	223.7	209	174.2	146.7	133.2	114.2	95.5	100.1	369.6	337.9	56.4885	57.7059	0.778722	0.701914	221.7	229.9	144.7	147.4	180.8	140.2	117.3	126.7	84.4	83.4	272.5	248.3	52.9093	55.1109	1.24948	0.951153
male = 1
female = 0
